# Supplementary material for: An In-Depth Exploration of Knowledge and Beliefs Associated with Soda and Diet Soda Consumption
Source: PubMed Central journal article supplement (PMC7551593; doi:10.3390/nu12092841), 2020-09-17
Supplement: nutrients-12-02841-s001.pdf [file nutrients-12-02841-s001.pdf]

**Table S1.** Knowledge and beliefs related to soda consumption ( $n=3430$ ).

|                                                                     | Soda consumption |                                          |                                      |                                    | $\chi^2$ p-value | Cramer's V |
|---------------------------------------------------------------------|------------------|------------------------------------------|--------------------------------------|------------------------------------|------------------|------------|
|                                                                     | Overall          | Frequent<br>(5 or more cups<br>per week) | Regular<br>(1 to 4 cups per<br>week) | Infrequent<br>(Monthly or<br>less) |                  |            |
|                                                                     | %                | %                                        | %                                    | %                                  |                  |            |
| Overall                                                             |                  | 8.8                                      | 20.2                                 | 70.9                               |                  |            |
| <b>Likelihood of health problems from sugary drink consumption</b>  |                  |                                          |                                      |                                    |                  |            |
| Likely for adults                                                   | 79.9             | <b>68.8</b>                              | 80.8                                 | <b>81.3</b>                        |                  |            |
| Not likely for adults                                               | 19.9             | <b>31.2</b>                              | 19.2                                 | <b>18.7</b>                        | <0.001           | 0.09       |
| Likely for children                                                 | 89.9             | <b>83.4</b>                              | 89.9                                 | <b>90.8</b>                        |                  |            |
| Not likely for children                                             | 10.1             | <b>16.6</b>                              | 10.1                                 | <b>9.2</b>                         | <0.001           | 0.07       |
| <b>Illnesses or health effects associated with soda consumption</b> |                  |                                          |                                      |                                    |                  |            |
| Diabetes ...reported                                                | 71.4             | <b>64.5</b>                              | <b>67.7</b>                          | <b>73.4</b>                        |                  |            |
| ...not reported                                                     | 28.5             | <b>35.5</b>                              | <b>32.3</b>                          | <b>26.6</b>                        | <0.001           | 0.07       |
| Weight gain ...reported                                             | 44.3             | <b>34.9</b>                              | <b>39.2</b>                          | <b>47.0</b>                        |                  |            |
| ...not reported                                                     | 55.7             | <b>65.1</b>                              | <b>60.8</b>                          | <b>53.0</b>                        | <0.001           | 0.09       |
| Heart disease ...reported                                           | 27.7             | 23.7                                     | 25.4                                 | 28.9                               |                  |            |
| ...not reported                                                     | 72.3             | 76.3                                     | 74.6                                 | 71.1                               | 0.051            | 0.04       |
| Tooth decay ...reported                                             | 18.8             | <b>11.0</b>                              | 17.5                                 | <b>20.0</b>                        |                  |            |
| ...not reported                                                     | 81.2             | <b>89.0</b>                              | 82.5                                 | <b>80.0</b>                        | <0.001           | 0.07       |
| Hypertension ...reported                                            | 8.2              | 9.0                                      | 8.7                                  | 7.9                                |                  |            |
| ...not reported                                                     | 91.8             | 91.0                                     | 91.3                                 | 92.1                               | 0.721            | 0.01       |
| Cancer ...reported                                                  | 6.5              | 4.3                                      | <b>3.8</b>                           | <b>7.6</b>                         |                  |            |
| ...not reported                                                     | 93.5             | 95.7                                     | <b>96.2</b>                          | <b>92.4</b>                        | <0.001           | 0.07       |
| <b>Relative healthiness of drinks: compared to soda</b>             |                  |                                          |                                      |                                    |                  |            |
| Fruit juices are...more healthy                                     | 58.5             | 58.7                                     | <b>64.4</b>                          | <b>57.7</b>                        |                  |            |
| ...less healthy                                                     | 5.4              | 7.7                                      | 5.9                                  | 5.0                                |                  |            |
| ...the same                                                         | 35.0             | 33.6                                     | <b>29.7</b>                          | <b>37.3</b>                        | 0.002            | 0.05       |
| Sports drinks are...more healthy                                    | 21.7             | 25.3                                     | <b>27.9</b>                          | <b>20.2</b>                        |                  |            |
| ...less healthy                                                     | 20.7             | 24.9                                     | 21.4                                 | 20.6                               |                  |            |
| ...the same                                                         | 55.3             | 49.8                                     | <b>50.7</b>                          | <b>59.2</b>                        | <0.001           | 0.06       |
| <b>In reference to a 600ml bottle of soda...</b>                    |                  |                                          |                                      |                                    |                  |            |
| <b>Teaspoons of sugar</b>                                           |                  |                                          |                                      |                                    |                  |            |
| Approx correct (11 to 20)                                           | 31.1             | 27.1                                     | 28.5                                 | 32.3                               |                  |            |
| Underestimate (1 to 10)                                             | 56.5             | 60.9                                     | 60.5                                 | 54.9                               |                  |            |
| Overestimate (21+)                                                  | 9.9              | 9.4                                      | 9.2                                  | 10.0                               |                  |            |
| Don't know                                                          | 2.5              | 2.7                                      | 1.7                                  | 2.7                                | 0.091            | 0.04       |
| <b>Total calories</b>                                               |                  |                                          |                                      |                                    |                  |            |
| Approx correct (201 to 300)                                         | 11.0             | <b>6.4</b>                               | 10.7                                 | 11.7                               |                  |            |
| Underestimate (0 to 200)                                            | 16.5             | 13.7                                     | 18.8                                 | 16.1                               |                  |            |
| Overestimate (301 to 600)                                           | 17.3             | 16.7                                     | 16.8                                 | 17.6                               |                  |            |
| Large over estimate (601+)                                          | 16.8             | 19.7                                     | <b>20.5</b>                          | <b>15.3</b>                        |                  |            |
| Don't know                                                          | 38.4             | 43.5                                     | <b>33.2</b>                          | 39.3                               | <0.001           | 0.07       |
| <b>Percent daily calories</b>                                       |                  |                                          |                                      |                                    |                  |            |
| Approx correct (10 to 14)                                           | 9.3              | 11.0                                     | 8.9                                  | 9.2                                |                  |            |
| Underestimate (0 to 9)                                              | 7.4              | 9.0                                      | 5.7                                  | 7.7                                |                  |            |
| Overestimate (15 to 40)                                             | 29.2             | 30.6                                     | <b>35.1</b>                          | <b>27.5</b>                        |                  |            |
| Large overestimate (41+)                                            | 29.7             | 27.9                                     | 27.9                                 | 30.6                               |                  |            |
| Don't know                                                          | 24.2             | 21.6                                     | 22.5                                 | 25.0                               | 0.009            | 0.05       |
| <b>Minutes of jogging to work off</b>                               |                  |                                          |                                      |                                    |                  |            |
| Approx correct (31 to 60)                                           | 37.3             | 34.1                                     | 37.1                                 | 37.9                               |                  |            |
| Underestimate (1 to 30)                                             | 32.3             | <b>39.1</b>                              | 32.8                                 | 31.3                               |                  |            |
| Overestimate (61 to 90)                                             | 5.6              | 2.7                                      | 5.6                                  | 5.9                                |                  |            |
| Large overestimate (91+)                                            | 19.6             | <b>16.7</b>                              | 19.9                                 | 20.0                               |                  |            |
| Don't know                                                          | 5.0              | 7.4                                      | 4.5                                  | 4.9                                | 0.039            | 0.05       |

Bold cells are statistically significant (based on adjusted standardised residuals).

**Table S2.** Knowledge and beliefs related to diet soda consumption.

|                                                                              | Diet soda consumption |                                             |                                      |                                    | $\chi^2$ p-value | Cramer' s V |
|------------------------------------------------------------------------------|-----------------------|---------------------------------------------|--------------------------------------|------------------------------------|------------------|-------------|
|                                                                              | Overall               | Frequent<br>(5 or more<br>cups per<br>week) | Regular (1 to 4<br>cups per<br>week) | Infrequent<br>(Monthly or<br>less) |                  |             |
|                                                                              | %                     | %                                           | %                                    | %                                  |                  |             |
| Overall                                                                      |                       | 6.6                                         | 11.5                                 | 81.9                               |                  |             |
| <b>Illnesses or health effects associated with DIET<br/>soda consumption</b> |                       |                                             |                                      |                                    |                  |             |
| Diabetes ...reported                                                         | 30.6                  | <b>15.4</b>                                 | <b>23.2</b>                          | <b>32.9</b>                        |                  |             |
| ...not reported                                                              | 69.4                  | <b>84.6</b>                                 | <b>76.8</b>                          | <b>67.1</b>                        | <0.001           | 0.11        |
| Weight gain ...reported                                                      | 16.4                  | <b>7.1</b>                                  | <b>12.7</b>                          | <b>17.7</b>                        |                  |             |
| ...not reported                                                              | 83.6                  | <b>92.9</b>                                 | <b>87.3</b>                          | <b>82.3</b>                        | <0.001           | 0.08        |
| Heart disease ...reported                                                    | 13.3                  | <b>4.4</b>                                  | 12.0                                 | <b>14.2</b>                        |                  |             |
| ...not reported                                                              | 86.7                  | <b>95.6</b>                                 | 88.0                                 | <b>85.8</b>                        | <0.001           | 0.07        |
| Tooth decay ...reported                                                      | 6.2                   | 4.0                                         | 6.6                                  | 6.4                                |                  |             |
| ...not reported                                                              | 93.7                  | 96.0                                        | 93.4                                 | 93.6                               | 0.329            | 0.03        |
| Hypertension ...reported                                                     | 4.4                   | 2.2                                         | 4.8                                  | 4.5                                |                  |             |
| ...not reported                                                              | 95.6                  | 97.8                                        | 95.2                                 | 95.5                               | 0.237            | 0.03        |
| Cancer ...reported                                                           | 14.7                  | 15.0                                        | <b>19.1</b>                          | <b>14.1</b>                        |                  |             |
| ...not reported                                                              | 85.3                  | 85.0                                        | <b>80.9</b>                          | <b>85.9</b>                        | 0.033            | 0.05        |
| <b>Relative healthiness of drinks: compared to<br/>soda...</b>               |                       |                                             |                                      |                                    |                  |             |
| Diet sodas are...more healthy                                                | 21.5                  | <b>57.1</b>                                 | <b>39.6</b>                          | <b>16.6</b>                        |                  |             |
| ...less healthy                                                              | 25.3                  | <b>8.8</b>                                  | <b>18.5</b>                          | <b>28.2</b>                        |                  |             |
| ...the same                                                                  | 51.3                  | <b>34.1</b>                                 | <b>41.9</b>                          | <b>55.3</b>                        | <0.001           | 0.21        |

Bold cells are statistically significant (based on adjusted standardised residuals).
